# Supplementary material
Source: PubMed Central journal article supplement (PMC2408822)
Supplement: en.2007-0425_3.pdf [file en.2007-0425_3.pdf]

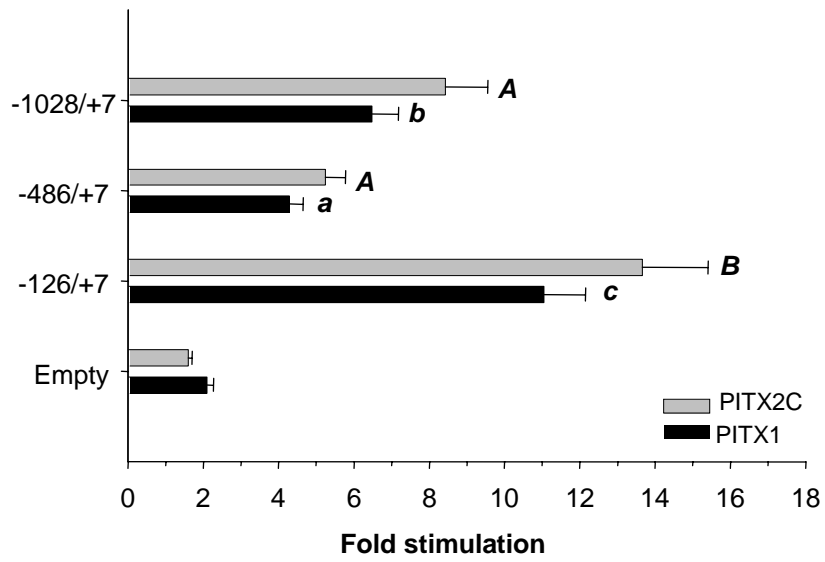

**Supplementary Fig. 1**

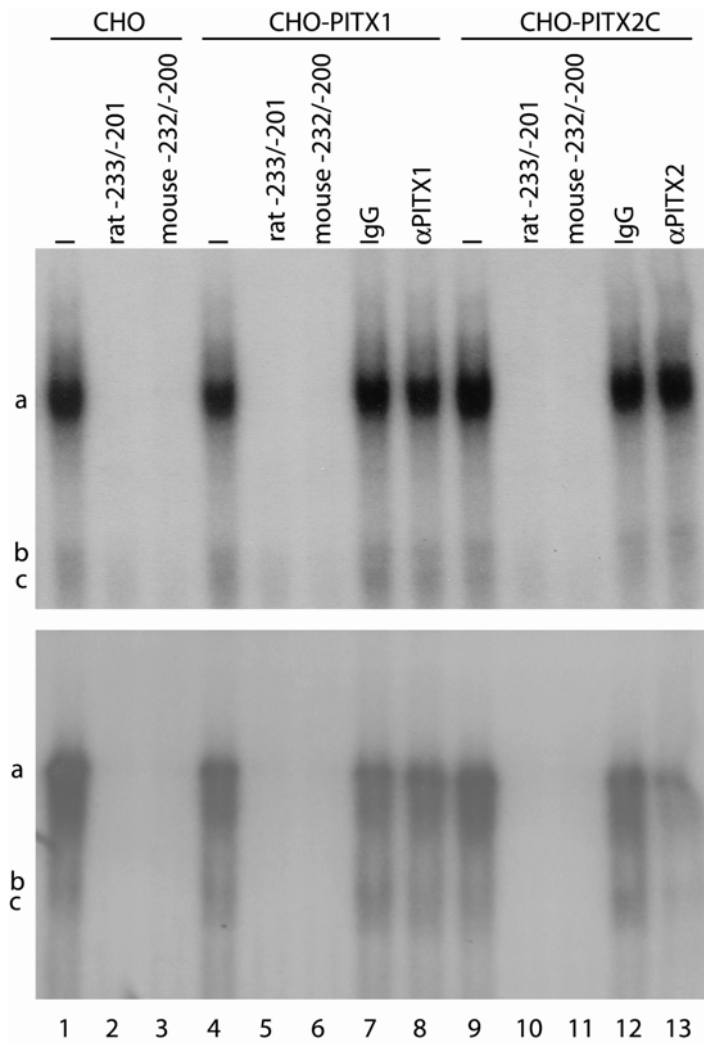

**Supplementary Fig. 2**

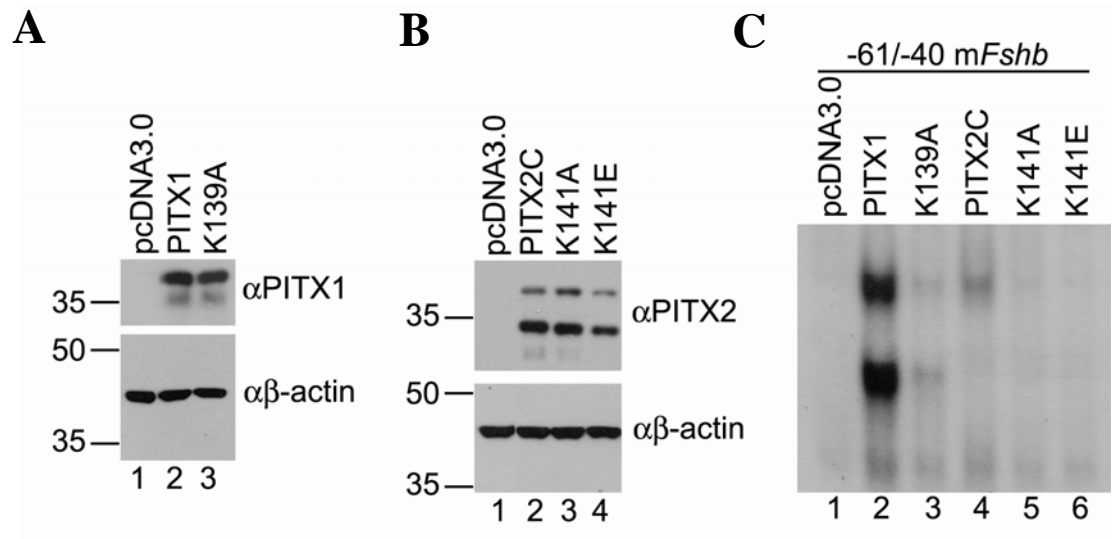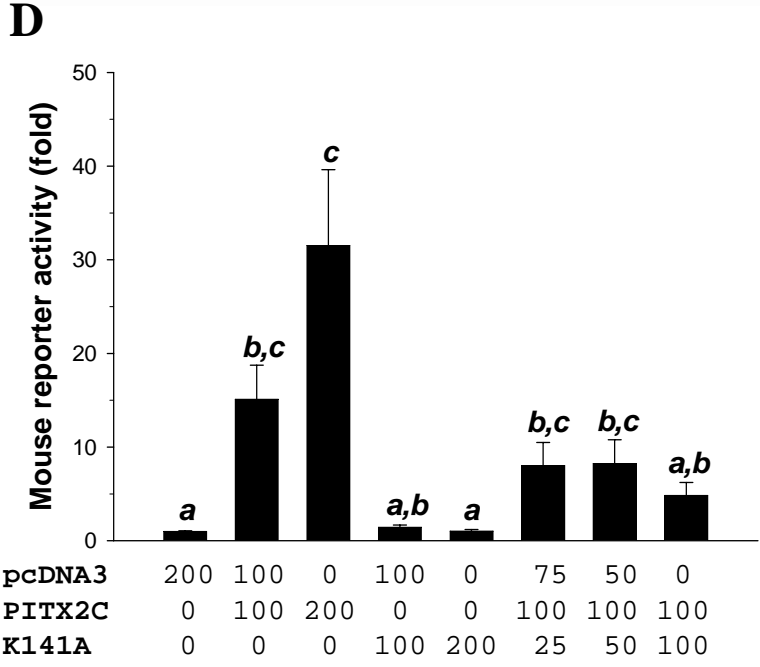

Supplementary Fig. 3

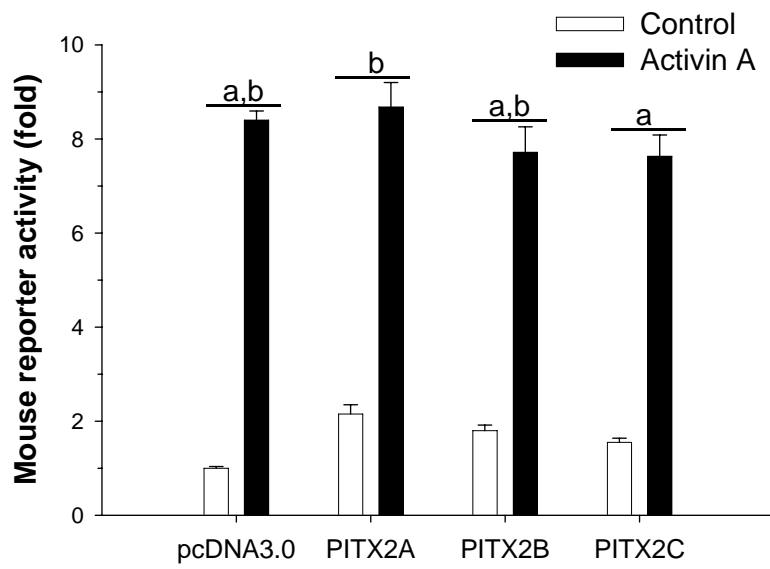

**Supplementary Fig. 4**

**A**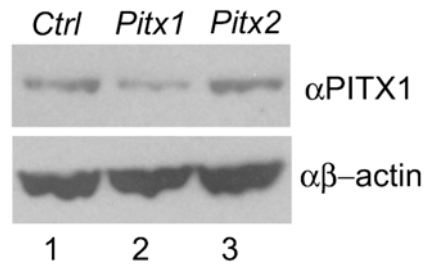**B**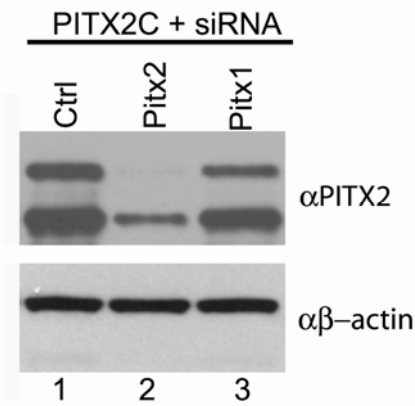**C**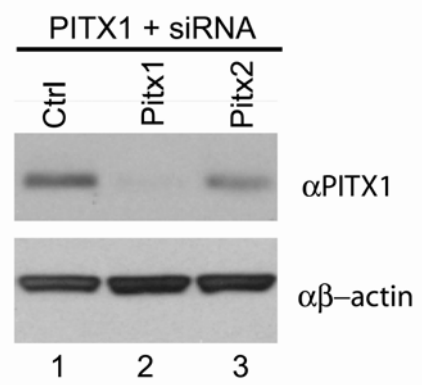

**A**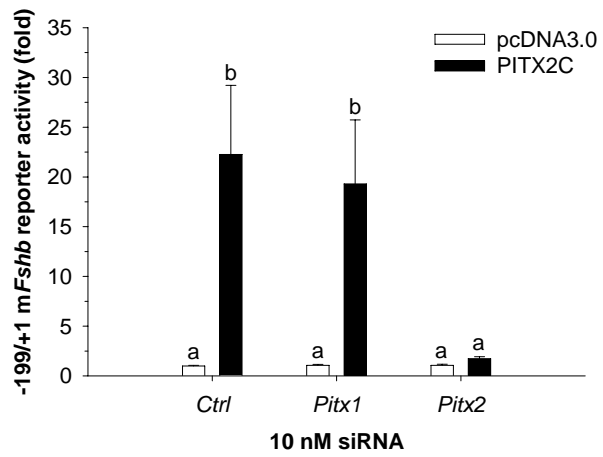**B**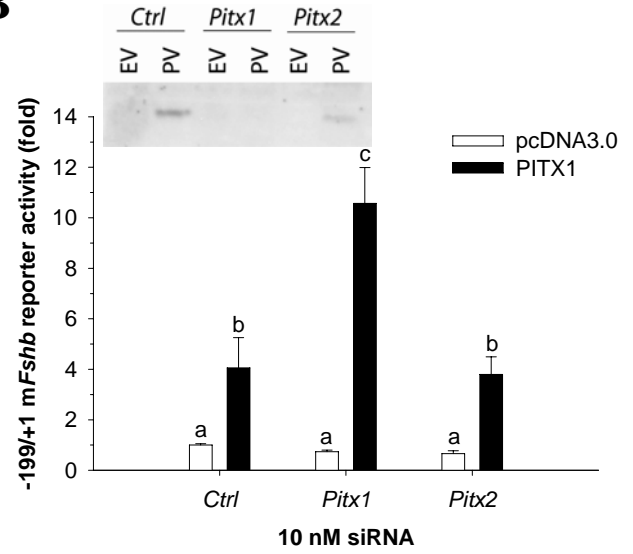**C**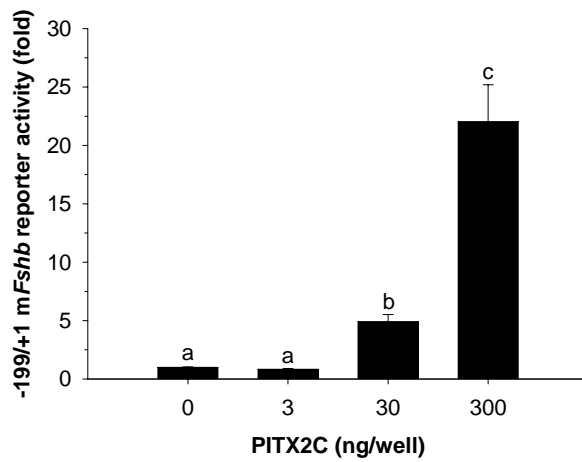**D**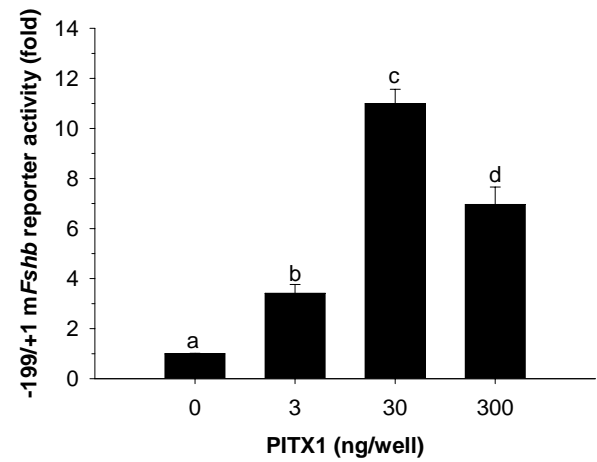

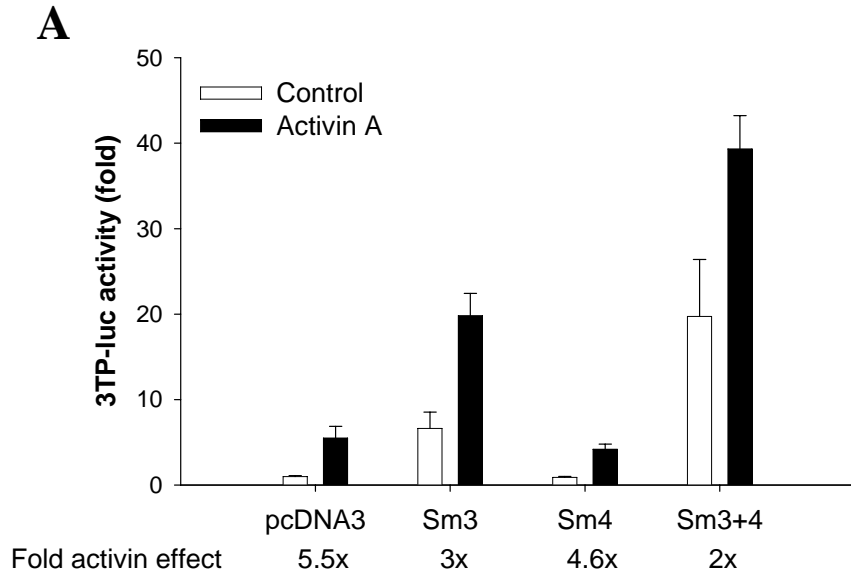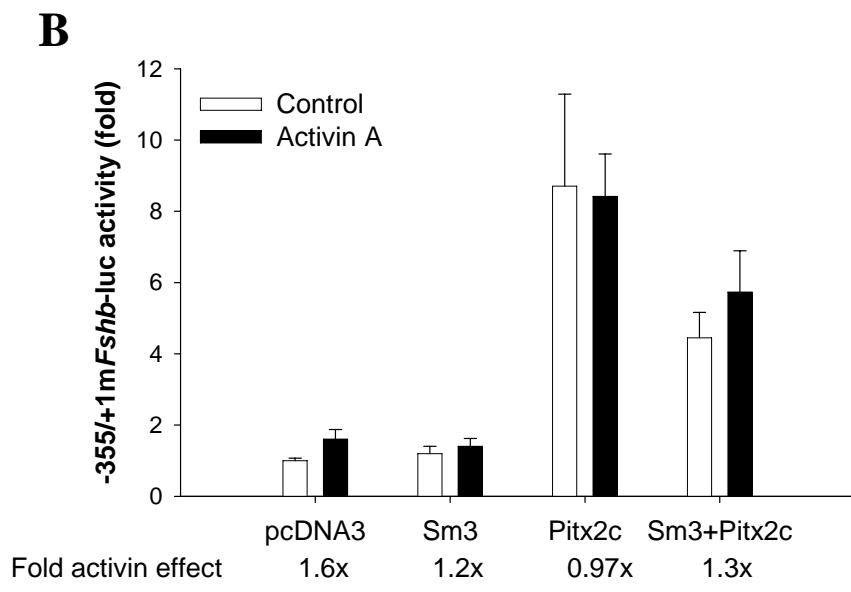

**Supplementary Fig. 7**

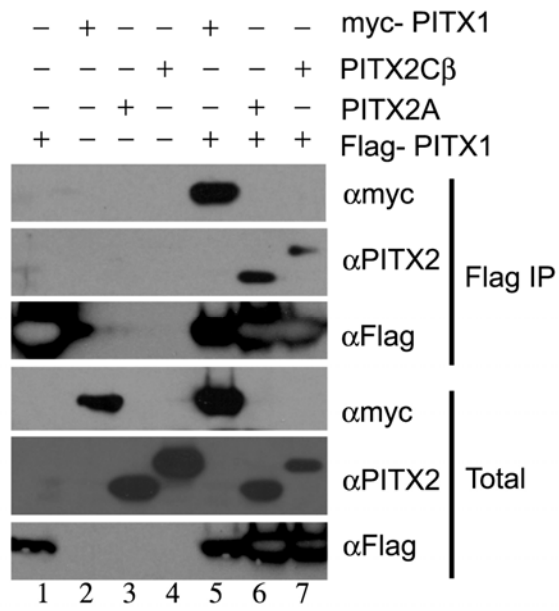

**Supplementary Fig. 8**
