# Supplementary material
Source: PubMed Central journal article supplement (PMC2408822)
Supplement: en.2007-0425_4.pdf [file en.2007-0425_4.pdf]

**Table 1: Primer and probe sequences**Mouse *Pitx* cDNA cloning

|                  |                                          |
|------------------|------------------------------------------|
| Pitx1.forward    | 5' ATGGACGCCTTCAAGGGAGGCAT 3'            |
| Pitx1.reverse    | 5' TCAGCTGTTGTACTGGCAAGCGT 3'            |
| Pitx2a/b.forward | 5' CGTACGAAGCTTATGGAGACCAATTGTCGCAAAC 3' |
| Pitx2c.forward   | 5' CGGGATCCTCCATGAACTGCATGAAAGGC3 '      |
| Pitx2.reverse    | 5' AGTTGCCCACTCCGACAGTCCT 3'             |

Murine *Fshb* reporter and ChIP

|                   |                              |
|-------------------|------------------------------|
| -199/-179.forward | 5' GTTTGTACAGAAACCATCATC 3'  |
| -21/+1.reverse    | 5' TGAGGTGTAACCTGACTCAGTG 3' |
| -505/-485.forward | 5' TGCTCTTCACAAAGCATCAGA 3'  |
| -305/-325.reverse | 5' TTTCTGAACATTGCTTTGGCT 3'  |
| -119/-98.forward  | 5' GTCCGTCTAAACAATGATTCCC3'  |
| pGL3.reverse      | 5' TTTACCAACAGTACCGGAATG 3'  |

Human *FSHB* reporters

|                   |                                                      |
|-------------------|------------------------------------------------------|
| -486/-459.forward | 5' CGC <u>ACGCGT</u> AATGTGGGAGGGAAAGAGAGATACAGTT 3' |
| -126/-98.forward  | 5' CGC <u>ACGCGT</u> CTAAACACTGATTCACTTACAGCAAGCT 3' |
| -21/+7.reverse    | 5' CGC <u>CTCGAG</u> CTGTAGACTGAATGAAATCTCAGTT 3'    |

Mutagenesis (sense strand)

|                       |                                                       |
|-----------------------|-------------------------------------------------------|
| m <i>Fshb</i> .PBEmut | 5' TTGGTCATGTTAACACCCAGTAGGTCGACAGGGTTTTAAGTTTGTAT 3' |
| h <i>FSHB</i> .PBEmut | 5' TTGGTCATATTAATACCCAACAGGTCGACAAGGTGTTAGTTGCACAT 3' |
| Pitx2c.K141E          | 5' CCGGGTTTGGTTCGAGAATCGCCGGG 3'                      |
| Pitx2c.K141A          | 5' GAGTCCGGGTTTGGTTCGCGAATCGCCGGGCCAAAT 3'            |
| Pitx1.K139A           | 5' GTGCGGGTCTGGTTCGCGAACCGGCGAGCCAAATG 3'             |

EMSA probes (sense strand)

-61/-40 *mFshb* WT            5' CACCCAGTAAATCCACAGGGTT 3'  
-61/-40 *mFshb* PBEmut       5' CACCCAGTAggTCgACAGGGTT 3'  
-232/-200 *mFshb*            5' TGAGGGAGTGGGTGTGCTGCCATATCAGATTCG 3'  
-233/-201 *rFshb*             5' TGAAGAGTGGGTGTGCTGCCATATCAGATTCG 3'

Epitope tagging of *Pitx1* cDNA

Flag *Pitx1*.Forward        5' CGGAATTCGACGCCTTCAAGGGA 3'  
Myc *Pitx1*.Forward        5' CAGGTACCCACCATGGAGCAGAAGCTGATCAGCGAGGAAGATCTG  
                                  GAATTCGACGCCTTCAAGGGAGGCATG 3'  
Tag *Pitx1*. reverse        5' ACTCTAGATTCAGCTGTTGTA CTG 3'
